# Supplementary material for: Effect of the Application of a Dehydrothermal Treatment on the Structure and the Mechanical Properties of Collagen Film
Source: PubMed Central journal article supplement (PMC7013574; doi:10.3390/ma13020377), 2020-01-14
Supplement: materials-13-00377-s001.pdf [file materials-13-00377-s001.pdf]

Supplementary Materials

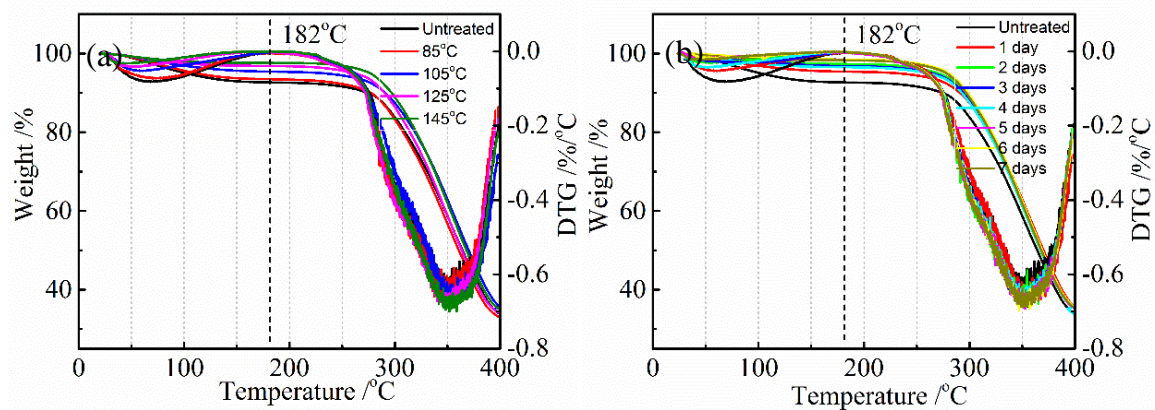

**Figure S1.** TGA curves and DTG curves of collagen films with DHT treatment, (a) at various DHT temperatures for 1 day; (b) for various DHT time at 105 °C.
